# Supplementary material for: Upregulation of Transferrin and Major Royal Jelly Proteins in the Spermathecal Fluid of Mated Honeybee (Apis mellifera) Queens
Source: MDPI journal article supplement (doi:10.3390/insects12080690), 2021-07-31
Supplement: s1 [file s1]

Table S1. The genes were differentially expressed in the spermathecae between mated queens and virgin queens.

| Feature_GID | BEEBASE | Product                                                          | Fold change<br>Mated queens/virgin queens | <i>p</i> -value |
|-------------|---------|------------------------------------------------------------------|-------------------------------------------|-----------------|
| gene75      | GB47662 | D-galactonate transporter                                        | -2.564208                                 | 4.8519E-05      |
| gene86      | GB47668 | lipase 3-like                                                    | -2.144253                                 | 0.00099219      |
| gene94      | .       | uncharacterized LOC107964453                                     | -3.153919                                 | 5.9968E-06      |
| gene95      | GB47740 | slit homolog 1 protein-like                                      | -2.131095                                 | 7.9784E-05      |
| gene98      | .       | uncharacterized LOC107964446                                     | 4.286483                                  | 0.00118273      |
| gene99      | .       | uncharacterized LOC100578187                                     | 3.975287                                  | 0.00033166      |
| gene100     | .       | uncharacterized LOC102655652                                     | 5.071412                                  | 0.00066779      |
| gene101     | .       | uncharacterized LOC102655720                                     | 2.140501                                  | 0.00450706      |
| gene102     | .       | uncharacterized LOC102655681                                     | 2.153250                                  | 0.00460862      |
| gene105     | .       | uncharacterized LOC102655805                                     | 2.962847                                  | 9.843E-05       |
| gene108     | .       | uncharacterized LOC102656241                                     | 11.606206                                 | 2.0354E-05      |
| gene137     | .       | uncharacterized LOC107963981                                     | 2.648546                                  | 0.00175064      |
| gene215     | GB52266 | furin-like protease 2                                            | -2.447660                                 | 0.0003209       |
| gene241     | .       | uncharacterized LOC102655293                                     | 2.225516                                  | 0.00427442      |
| gene297     | GB54868 | phospholipase A1 member A                                        | -2.432225                                 | 0.00011127      |
| gene312     | .       | uncharacterized LOC100577822                                     | 2.926827                                  | 0.00403267      |
| gene315     | .       | uncharacterized LOC102654454                                     | 3.218253                                  | 0.00023175      |
| gene326     | GB54851 | zinc transporter 1                                               | -3.113637                                 | 4.5134E-05      |
| gene332     | GB40947 | sodium-dependent dopamine transporter-like                       | -3.491289                                 | 0.00074537      |
| gene337     | GB40944 | A disintegrin and metalloproteinase with thrombospondin motifs 8 | -2.581967                                 | 0.00053651      |
| gene392     | GB40769 | farnesol dehydrogenase-like                                      | -2.049116                                 | 1.5709E-05      |
| gene448     | GB40734 | fructose-bisphosphate aldolase-like                              | 2.090814                                  | 6.5319E-05      |
| gene456     | GB40838 | endoglucanase E-4-like                                           | 2.628086                                  | 1.1548E-06      |
| gene458     | .       | uncharacterized LOC107964593                                     | 2.818459                                  | 0.00061114      |
| gene491     | GB40864 | titin-like                                                       | 2.679627                                  | 0.00020807      |
| gene504     | GB40867 | dopamine transporter                                             | -3.197902                                 | 0.00127479      |
| gene514     | .       | uncharacterized LOC102656814                                     | -3.710508                                 | 0.0012693       |
| gene529     | GB51820 | glucose dehydrogenase [FAD, quinone]                             | 4.546175                                  | 6.6421E-05      |
| gene536     | .       | uncharacterized LOC107965619                                     | -2.144644                                 | 2.618E-05       |
| gene538     | GB51854 | potassium voltage-gated channel subfamily KQT member 1-like      | -2.827809                                 | 0.00057798      |
| gene556     | GB51841 | multiple inositol polyphosphate phosphatase 1-like               | -2.022092                                 | 3.5935E-07      |
| gene562     | GB48975 | uncharacterized LOC100576961                                     | -3.863469                                 | 0.00010368      |

|          |         |                                                                       |            |            |
|----------|---------|-----------------------------------------------------------------------|------------|------------|
| gene563  | GB48978 | solute carrier family 22 member 8-like                                | -2.695607  | 8.1169E-07 |
| gene646  | GB41073 | N-acetylgalactosamine kinase                                          | 2.163981   | 0.00027165 |
| gene647  | GB41074 | uncharacterized LOC409078                                             | -3.951845  | 0.01237122 |
| gene648  | GB41034 | facilitated trehalose transporter Tret1-like                          | -2.202451  | 0.00313518 |
| gene668  | .       | uncharacterized LOC102656299                                          | 2.658538   | 0.00018003 |
| gene682  | GB46547 | uncharacterized LOC409701                                             | -3.494821  | 0.00302267 |
| gene695  | GB45852 | MAGUK p55 subfamily member 7                                          | -2.851415  | 9.2563E-05 |
| gene700  | GB45850 | clavesin-2                                                            | -3.459430  | 0.01151364 |
| gene717  | GB45834 | pyruvate dehydrogenase E1 component subunit alpha, mitochondrial-like | -2.321978  | 0.00046421 |
| gene718  | GB45833 | uncharacterized LOC413907                                             | -3.534125  | 2.021E-05  |
| gene751  | GB45884 | acyl-coenzyme A:6-aminopenicillanic-acid-acyltransferase 40 kDa form  | -14.585273 | 2.3757E-06 |
| gene778  | GB44772 | ATP-binding cassette sub-family G member 4-like                       | -2.416225  | 3.5512E-05 |
| gene805  | .       | uncharacterized LOC102656816                                          | 9.396189   | 1.9134E-05 |
| gene821  | .       | uncharacterized LOC100578133                                          | 2.137019   | 0.00016496 |
| gene826  | .       | uncharacterized LOC100578110                                          | 2.736633   | 6.907E-05  |
| gene835  | GB44803 | pyrimidodiazepine synthase                                            | 2.058953   | 1.6545E-05 |
| gene836  | .       | uncharacterized LOC107964502                                          | -2.073830  | 0.01497813 |
| gene840  | .       | uncharacterized LOC107964509                                          | 2.115558   | 0.04164129 |
| gene842  | GB44808 | peroxidasin                                                           | -3.382114  | 1.245E-05  |
| gene848  | .       | farnesol dehydrogenase-like                                           | 2.025442   | 0.00268602 |
| gene878  | GB46518 | uncharacterized LOC726920                                             | -2.098033  | 0.01545546 |
| gene894  | .       | uncharacterized LOC102655469                                          | 3.425346   | 0.00024837 |
| gene896  | .       | uncharacterized LOC102655422                                          | 2.537559   | 0.00306184 |
| gene897  | GB46422 | proton-coupled amino acid transporter 1                               | -2.415311  | 4.8765E-07 |
| gene959  | GB46468 | uncharacterized LOC726722                                             | 2.118117   | 1.3763E-05 |
| gene993  | GB55280 | serpin B3-like                                                        | 2.152918   | 0.00063316 |
| gene1019 | GB47373 | UPF0769 protein C21orf59 homolog                                      | -2.046222  | 1.7383E-05 |
| gene1026 | GB47379 | histidine decarboxylase                                               | -2.115511  | 0.00035394 |
| gene1029 | .       | histone H3                                                            | 2.628803   | 0.0028924  |
| gene1031 | .       | histone H2B-like                                                      | 2.204490   | 0.00271175 |
| gene1036 | GB47503 | delta-1-pyrroline-5-carboxylate synthase                              | -2.825125  | 1.2994E-06 |
| gene1069 | .       | histone H3                                                            | 2.215801   | 0.00055832 |
| gene1081 | GB47478 | glutathione peroxidase-like 1                                         | 2.072996   | 0.04964722 |
| gene1087 | GB47475 | protein lethal(2)essential for life-                                  | 2.656032   | 7.8979E-06 |

|          |         |                                                                    |           |            |
|----------|---------|--------------------------------------------------------------------|-----------|------------|
|          |         | like                                                               |           |            |
| gene1108 | GB47463 | guanine nucleotide-binding protein G(i) subunit alpha              | 2.708939  | 0.00248651 |
| gene1140 | GB49726 | thrombospondin type-1 domain-containing protein 4-like             | -3.909972 | 0.00011542 |
| gene1148 | GB49732 | rho guanine nucleotide exchange factor 17                          | -2.338713 | 1.4086E-05 |
| gene1159 | GB51938 | leucine rich repeat G protein coupled receptor                     | -2.544625 | 8.5772E-05 |
| gene1219 | GB42196 | thrombospondin type-1 domain-containing protein 4-like             | -2.558696 | 3.6607E-06 |
| gene1258 | GB42220 | electroneutral sodium bicarbonate exchanger 1                      | -2.067893 | 0.00026891 |
| gene1261 | .       | acyl-CoA Delta(11) desaturase-like                                 | 3.344400  | 0.0089205  |
| gene1262 | GB42218 | acyl-CoA Delta(11) desaturase                                      | 2.647423  | 5.4382E-05 |
| gene1263 | .       | acyl-CoA desaturase-like                                           | 3.145868  | 2.3637E-05 |
| gene1331 | .       | uncharacterized LOC107966053                                       | 3.025765  | 6.4862E-05 |
| gene1342 | GB51591 | 3-hydroxy-3-methylglutaryl-coenzyme A reductase                    | -3.274753 | 0.00025859 |
| gene1356 | GB51583 | kynurenine/alpha-aminoadipate aminotransferase, mitochondrial-like | -2.157992 | 5.7745E-05 |
| gene1432 | GB51636 | ribonuclease kappa-B                                               | -2.010947 | 0.00010524 |
| gene1459 | .       | uncharacterized LOC107966045                                       | -3.337933 | 6.6688E-05 |
| gene1519 | .       | microRNA 6053                                                      | 5.653627  | 0.00018634 |
| gene1535 | GB54988 | mitochondrial sodium/hydrogen exchanger 9B2-like                   | -2.674213 | 0.00155006 |
| gene1544 | .       | probable RNA methyltransferase CG11342                             | 2.062047  | 0.02059464 |
| gene1545 | .       | tribbles homolog 2                                                 | 2.044614  | 3.4432E-05 |
| gene1568 | GB13325 | chemosensory protein 6                                             | 2.217890  | 0.00017506 |
| gene1578 | .       | uncharacterized LOC107965571                                       | -6.730173 | 0.00560413 |
| gene1610 | GB53925 | uncharacterized LOC724993                                          | 3.764129  | 0.00012167 |
| gene1666 | .       | myb-related transcription factor, partner of profilin-like         | 2.957300  | 0.00014218 |
| gene1689 | .       | uncharacterized LOC100577437                                       | 2.380166  | 0.00048221 |
| gene1726 | GB50700 | fibrillin-1-like                                                   | -2.337067 | 0.00411434 |
| gene1739 | GB46311 | cuticular protein 21                                               | -2.330789 | 0.00083989 |
| gene1740 | GB46312 | cuticular protein 22                                               | -2.739141 | 0.00240793 |
| gene1742 | GB46297 | cuticular protein 14                                               | -2.136552 | 0.00131358 |
| gene1743 | .       | uncharacterized LOC107964094                                       | 2.209405  | 0.02907987 |
| gene1785 | .       | ceramide phosphoethanolamine synthase                              | 2.411391  | 7.1883E-06 |
| gene1803 | GB43455 | uncharacterized LOC100578397                                       | 21.100940 | 0.00560237 |
| gene1807 | GB43453 | band 4.1-like protein 4A                                           | -2.165238 | 5.4067E-05 |

|          |         |                                                     |            |            |
|----------|---------|-----------------------------------------------------|------------|------------|
| gene1810 | GB45906 | uncharacterized LOC410087                           | 4.680952   | 2.3618E-06 |
| gene1812 | GB45910 | protein lethal(2)essential for life-like            | 34.151509  | 2.5896E-05 |
| gene1813 | .       | protein lethal(2)essential for life-like            | 18.387163  | 1.5957E-05 |
| gene1814 | GB45912 | protein lethal(2)essential for life-like            | 3.107037   | 1.3465E-06 |
| gene1829 | .       | uncharacterized LOC107964083                        | 11.838154  | 1.5816E-05 |
| gene1830 | GB50772 | uncharacterized LOC100578420                        | 2.752550   | 0.00015681 |
| gene1893 | GB50831 | protein canopy homolog 2                            | -3.430001  | 5.5847E-05 |
| gene1974 | .       | probable salivary secreted peptide                  | -4.134599  | 0.00338716 |
| gene2002 | .       | uncharacterized LOC102656216                        | 3.448415   | 0.00197415 |
| gene2036 | .       | uncharacterized LOC726803                           | 2.682654   | 0.00025727 |
| gene2041 | GB52467 | uncharacterized LOC408695                           | -2.788808  | 0.00112627 |
| gene2135 | .       | uncharacterized LOC107966102                        | 4.267583   | 0.00636244 |
| gene2143 | GB52497 | mitochondrial import receptor subunit TOM20 homolog | -2.424779  | 0.00036019 |
| gene2159 | GB52343 | neurotrimin                                         | 2.857148   | 3.6736E-08 |
| gene2180 | .       | uncharacterized LOC102653599                        | 4.861269   | 1.1183E-07 |
| gene2181 | GB49775 | protein lethal(2)essential for life-like            | 3.460410   | 0.00056708 |
| gene2202 | .       | uncharacterized LOC102654905                        | -2.256845  | 0.00013953 |
| gene2215 | GB49809 | calmodulin-like                                     | -3.529398  | 9.2871E-05 |
| gene2273 | .       | cofilin/actin-depolymerizing factor homolog         | 2.201828   | 0.00035568 |
| gene2286 | GB55638 | tryptophan 2,3-dioxygenase                          | -4.041994  | 0.00010655 |
| gene2310 | .       | uncharacterized LOC102653583                        | 2.002765   | 0.0002512  |
| gene2320 | .       | protein THEM6-like                                  | -2.774529  | 0.00017611 |
| gene2326 | GB55613 | uncharacterized LOC100576118                        | -4.722262  | 1.2405E-05 |
| gene2327 | GB55612 | uncharacterized LOC552320                           | -28.728309 | 1.3415E-06 |
| gene2329 | GB55396 | uncharacterized LOC552356                           | -3.094109  | 0.00016415 |
| gene2330 | .       | microRNA 6060                                       | -2.958942  | 0.00030233 |
| gene2334 | GB55403 | uncharacterized LOC410819                           | -2.558818  | 5.0383E-05 |
| gene2355 | GB55598 | troponin I                                          | -2.783162  | 5.656E-06  |
| gene2371 | GB55426 | uncharacterized LOC725893                           | 3.104666   | 0.00015581 |
| gene2379 | GB55591 | titin                                               | 2.331660   | 5.921E-05  |
| gene2420 | GB55443 | endoplasmic reticulum resident protein 29           | -3.162470  | 4.0016E-07 |
| gene2427 | .       | uncharacterized LOC102656130                        | 2.433459   | 6.949E-06  |
| gene2442 | GB55561 | copper transport protein ATOX1                      | -2.220398  | 0.00020377 |
| gene2464 | GB55547 | chemosensory protein 2                              | -2.001815  | 0.00021499 |
| gene2502 | .       | uncharacterized LOC107966105                        | 3.165179   | 9.13E-05   |
| gene2514 | GB55516 | bone morphogenetic protein 2-B                      | 2.976143   | 2.6483E-05 |

|          |         |                                                                |            |            |
|----------|---------|----------------------------------------------------------------|------------|------------|
| gene2515 | GB55515 | inositol oxygenase                                             | 3.377126   | 3.4625E-05 |
| gene2524 | GB55499 | alkaline phosphatase 4-like                                    | -16.088831 | 1.1394E-06 |
| gene2525 | .       | uncharacterized LOC107963987                                   | -9.647610  | 4.7053E-05 |
| gene2526 | .       | uncharacterized LOC100577377                                   | -11.810446 | 8.9611E-05 |
| gene2528 | GB55503 | solute carrier family 41 member 1-like                         | 2.799691   | 1.1431E-05 |
| gene2545 | GB55998 | beta-1,4-N-acetylgalactosaminyltransferase bre-4               | -2.192636  | 2.0727E-05 |
| gene2547 | GB55997 | low density lipoprotein receptor adapter protein 1-B-like      | -3.996433  | 1.3529E-05 |
| gene2551 | GB56017 | paired mesoderm homeobox protein 2-like                        | -6.691733  | 0.00010365 |
| gene2554 | GB51881 | uncharacterized LOC100577971                                   | 6.787772   | 1.1756E-06 |
| gene2556 | .       | uncharacterized LOC100577932                                   | 4.704217   | 0.00012845 |
| gene2602 | .       | uncharacterized LOC102654462                                   | 4.450712   | 6.1315E-05 |
| gene2613 | .       | uncharacterized LOC107964144                                   | 2.275340   | 0.00049741 |
| gene2614 | .       | uncharacterized LOC102654823                                   | 2.105173   | 0.00252327 |
| gene2670 | .       | uncharacterized LOC102654687                                   | 2.241979   | 0.0231318  |
| gene2671 | GB49054 | uncharacterized LOC410975                                      | 2.616080   | 5.3665E-05 |
| gene2736 | .       | uncharacterized LOC100576853                                   | 2.357625   | 4.4456E-05 |
| gene2744 | .       | uncharacterized LOC100577278                                   | -2.182232  | 0.0041316  |
| gene2747 | .       | uncharacterized LOC100577303                                   | 2.210966   | 0.00485772 |
| gene2754 | GB46962 | SH3 domain-binding glutamic acid-rich protein homolog          | 2.181002   | 4.7824E-05 |
| gene2792 | GB51487 | proton-coupled amino acid transporter 1-like                   | 2.214671   | 0.00019118 |
| gene2835 | GB55813 | uncharacterized LOC100577773                                   | -6.291073  | 0.00052742 |
| gene2871 | GB55767 | cGMP-dependent protein kinase 1-like                           | -2.388436  | 0.0001699  |
| gene2899 | GB55846 | kinesin 12                                                     | 2.339830   | 4.1066E-05 |
| gene3038 | .       | uncharacterized LOC107964193                                   | 3.397421   | 5.3346E-06 |
| gene3039 | .       | uncharacterized LOC100576419                                   | 2.429342   | 0.00186758 |
| gene3059 | GB53835 | zinc finger protein 395                                        | -2.030538  | 5.7022E-06 |
| gene3090 | GB49184 | PH domain leucine-rich repeat-containing protein phosphatase 2 | 2.186911   | 0.0001633  |
| gene3101 | .       | uncharacterized LOC102656502                                   | 2.987246   | 0.00182787 |
| gene3125 | GB47055 | putative inorganic phosphate cotransporter                     | 12.828862  | 1.8182E-05 |
| gene3131 | .       | uncharacterized LOC102654960                                   | -2.270224  | 0.00030958 |
| gene3150 | .       | uncharacterized LOC107964139                                   | 2.154922   | 0.00090472 |
| gene3151 | .       | uncharacterized LOC100577718                                   | 2.298350   | 0.00041932 |
| gene3184 | GB41203 | cuticular protein analogous to peritrophins 3-C                | -2.623140  | 2.9002E-05 |
| gene3225 | GB41223 | uncharacterized LOC100578584                                   | 2.443592   | 0.00126982 |

|          |         |                                                              |            |            |
|----------|---------|--------------------------------------------------------------|------------|------------|
| gene3236 | .       | uncharacterized LOC100578320                                 | 2.993226   | 3.4484E-05 |
| gene3237 | GB41228 | uncharacterized LOC724900                                    | 3.217730   | 0.00091358 |
| gene3266 | GB46142 | sarcoplasmic calcium-binding protein                         | 5.529534   | 7.3252E-05 |
| gene3313 | GB49639 | putative defense protein 3                                   | -2.043354  | 0.01069059 |
| gene3349 | GB53119 | apidermin 2                                                  | -2.526320  | 0.00042838 |
| gene3351 | GB53114 | apidermin 3                                                  | -2.075275  | 0.04423855 |
| gene3364 | .       | transcriptional regulator ATRX homolog                       | -3.874316  | 1.1675E-07 |
| gene3365 | GB53104 | cubilin                                                      | -2.472835  | 0.00036778 |
| gene3391 | GB53139 | testican-1                                                   | -2.127334  | 0.00038837 |
| gene3517 | GB49543 | alanine--glyoxylate aminotransferase 2-like                  | 3.792303   | 3.628E-05  |
| gene3518 | GB49544 | vitellogenin                                                 | 6.160663   | 6.659E-06  |
| gene3523 | .       | uncharacterized LOC102656496                                 | 12.583079  | 5.9593E-06 |
| gene3524 | .       | uncharacterized LOC107964285                                 | 13.748905  | 1.0015E-05 |
| gene3635 | GB50438 | cuticular protein 27                                         | -2.862854  | 0.00182424 |
| gene3639 | GB50449 | uncharacterized LOC100578672                                 | -6.713950  | 1.6054E-05 |
| gene3641 | GB50450 | bromodomain-containing protein 4-like                        | -5.780669  | 8.7189E-05 |
| gene3663 | GB50423 | uncharacterized LOC408807                                    | 6.134058   | 7.6462E-05 |
| gene3731 | GB42994 | tensin-1                                                     | -6.096421  | 3.6622E-06 |
| gene3750 | .       | uncharacterized LOC102655336                                 | -7.544994  | 7.8218E-05 |
| gene3782 | .       | uncharacterized LOC726866                                    | 2.525247   | 5.5729E-05 |
| gene3783 | GB44112 | melittin                                                     | -7.664072  | 4.1585E-06 |
| gene3810 | GB44080 | protein-L-isoaspartate(D-aspartate) O-methyltransferase-like | 2.362317   | 7.5435E-06 |
| gene3824 | GB44133 | tubulin beta-1                                               | 2.112561   | 0.00122761 |
| gene3828 | GB44074 | tubulin beta chain                                           | -2.144658  | 0.00269789 |
| gene3904 | .       | uncharacterized LOC107964318                                 | 2.568308   | 0.0180489  |
| gene3935 | .       | uncharacterized LOC725381                                    | 9.651677   | 9.5156E-06 |
| gene3952 | GB44213 | filamin-like                                                 | 4.301521   | 1.8757E-05 |
| gene3968 | GB44005 | sialin-like                                                  | 2.243046   | 1.4972E-05 |
| gene3979 | .       | uncharacterized LOC100576929                                 | -2.115087  | 0.0001183  |
| gene3994 | GB53015 | protein FAM151B                                              | 3.897279   | 1.9998E-05 |
| gene3995 | .       | DNA ligase 1-like                                            | 2.170933   | 0.00024609 |
| gene4091 | GB52279 | neurexin 1                                                   | -3.235286  | 0.00104212 |
| gene4092 | .       | secapin                                                      | -13.812339 | 9.8897E-08 |
| gene4093 | .       | uncharacterized LOC102655788                                 | -27.103996 | 7.7421E-07 |
| gene4100 | GB52324 | chemosensory protein 3                                       | -2.141367  | 0.00016245 |
| gene4106 | .       | uncharacterized LOC107964518                                 | -2.694538  | 3.6265E-06 |

|          |         |                                                                                                                       |           |            |
|----------|---------|-----------------------------------------------------------------------------------------------------------------------|-----------|------------|
| gene4114 | GB48871 | DNA polymerase epsilon subunit 2                                                                                      | 2.468588  | 0.00653441 |
| gene4199 | GB46726 | proclotting enzyme                                                                                                    | -2.012130 | 0.00112979 |
| gene4230 | GB46703 | synaptonemal complex protein ZEP1-like                                                                                | 2.291103  | 0.00037861 |
| gene4251 | GB46774 | dnaJ protein homolog 1                                                                                                | 2.023128  | 0.00038995 |
| gene4284 | .       | uncharacterized LOC102655605                                                                                          | 4.604567  | 0.00034754 |
| gene4286 | .       | uncharacterized LOC102655278                                                                                          | 2.589883  | 0.00133362 |
| gene4296 | .       | uncharacterized LOC100576657                                                                                          | 2.962831  | 6.4988E-07 |
| gene4390 | .       | uncharacterized LOC102654470                                                                                          | 2.164638  | 0.00297721 |
| gene4444 | GB50302 | RNA-binding protein 34-like                                                                                           | 2.037269  | 3.6459E-06 |
| gene4456 | .       | uncharacterized LOC725148                                                                                             | -3.856580 | 0.00017563 |
| gene4463 | GB44564 | protein NPC2 homolog                                                                                                  | -2.302471 | 0.00022682 |
| gene4466 | GB44548 | glucose dehydrogenase [FAD, quinone]                                                                                  | 4.022667  | 9.8136E-06 |
| gene4515 | GB44596 | uncharacterized LOC409510                                                                                             | 2.356587  | 0.00072616 |
| gene4528 | GB44513 | cytochrome P450 4c3                                                                                                   | -2.257312 | 4.8448E-06 |
| gene4529 | GB44607 | uncharacterized LOC100578566                                                                                          | -2.313572 | 3.536E-05  |
| gene4543 | GB44503 | uncharacterized LOC727423                                                                                             | 4.165467  | 1.0057E-05 |
| gene4548 | .       | uncharacterized LOC107964500                                                                                          | 3.875281  | 0.00199476 |
| gene4552 | GB44616 | EF-hand domain-containing family member C2-like                                                                       | 8.815590  | 0.00014018 |
| gene4555 | GB44494 | arylsulfatase B-like                                                                                                  | -2.320036 | 0.00019883 |
| gene4556 | GB44493 | arylsulfatase B-like                                                                                                  | 7.359991  | 2.5987E-07 |
| gene4559 | GB44491 | nucleoside-triphosphatase THEP1                                                                                       | -2.349434 | 0.00011762 |
| gene4566 | .       | uncharacterized LOC102656464                                                                                          | -2.299786 | 0.00119109 |
| gene4568 | .       | uncharacterized LOC107964475                                                                                          | 3.805515  | 0.00738676 |
| gene4569 | .       | uncharacterized LOC100576597                                                                                          | 2.466153  | 0.00097136 |
| gene4581 | .       | uncharacterized LOC102654490                                                                                          | -2.003769 | 0.01448566 |
| gene4603 | .       | uncharacterized LOC107963997                                                                                          | 2.751844  | 0.00199041 |
| gene4665 | GB44430 | dihydrolipoyllysine-residue succinyltransferase component of 2-oxoglutarate dehydrogenase complex, mitochondrial-like | -2.744234 | 0.00140685 |
| gene4685 | GB44419 | septin-7                                                                                                              | 2.262664  | 7.6698E-05 |
| gene4702 | GB44412 | hemicentin-2                                                                                                          | -3.163507 | 9.1369E-07 |
| gene4707 | GB44708 | odorant receptor 13a-like                                                                                             | 2.574165  | 0.00094813 |
| gene4715 | GB47849 | pyrroline-5-carboxylate reductase 2                                                                                   | -3.029100 | 8.8643E-08 |
| gene4716 | GB47814 | transmembrane protein 135-like                                                                                        | -7.421561 | 9.9247E-05 |
| gene4718 | GB47815 | haloacid dehalogenase-like hydrolase domain-containing protein 2                                                      | -2.451360 | 0.00062708 |
| gene4756 | GB41945 | uncharacterized LOC726189                                                                                             | 5.601916  | 3.3032E-05 |

|          |         |                                                              |            |            |
|----------|---------|--------------------------------------------------------------|------------|------------|
| gene4757 | .       | uncharacterized LOC102656699                                 | 5.766141   | 0.00089865 |
| gene4762 | GB41376 | J domain-containing protein                                  | 2.055446   | 1.1911E-05 |
| gene4767 | .       | waprin-Thr1                                                  | 2.347957   | 3.8164E-06 |
| gene4771 | GB41289 | uncharacterized LOC411664                                    | 5.392076   | 0.02246337 |
| gene4772 | .       | uncharacterized LOC102656586                                 | 5.956198   | 9.113E-05  |
| gene4811 | GB41301 | annexin B9-like                                              | 2.546501   | 0.00015721 |
| gene4824 | .       | actin, clone 205-like                                        | -2.982343  | 5.8953E-05 |
| gene4825 | .       | uncharacterized LOC102654094                                 | -2.991135  | 0.00489641 |
| gene4826 | .       | actin, clone 205-like                                        | -2.467784  | 0.00019049 |
| gene4828 | GB41310 | actin, muscle-like                                           | -2.658652  | 0.00039274 |
| gene4842 | GB41325 | uncharacterized LOC100578835                                 | 3.064330   | 0.00020114 |
| gene4843 | .       | uncharacterized LOC100577646                                 | 2.033151   | 0.00053994 |
| gene4844 | .       | uncharacterized LOC100577107                                 | 3.936892   | 0.00105704 |
| gene4860 | GB45633 | uncharacterized LOC726990                                    | 2.943623   | 0.00010427 |
| gene4885 | GB45650 | uncharacterized aarF domain-containing protein kinase 2-like | 2.713077   | 0.00081739 |
| gene4891 | GB45654 | gamma-glutamyltranspeptidase 1-like                          | -2.499407  | 6.9601E-06 |
| gene4911 | .       | uncharacterized LOC102654951                                 | -2.033322  | 0.03757235 |
| gene4915 | GB45700 | serine protease easter                                       | 3.059854   | 0.00033508 |
| gene4927 | GB45692 | dentin sialophosphoprotein                                   | -2.336451  | 0.00011728 |
| gene4928 | GB45673 | alpha-N-acetylgalactosaminidase                              | -4.595871  | 1.0792E-05 |
| gene4932 | GB45688 | synaptic vesicle membrane protein VAT-1 homolog-like         | 2.234828   | 1.324E-05  |
| gene4949 | GB51188 | lysophospholipid acyltransferase 2                           | 2.589642   | 3.5589E-06 |
| gene4960 | GB51214 | troponin T, skeletal muscle                                  | -3.198362  | 5.4491E-05 |
| gene4977 | GB51200 | DNA-binding protein D-ETS-6-like                             | 3.479310   | 9.5048E-05 |
| gene4980 | GB45771 | glycine-rich RNA-binding protein 7                           | -25.982012 | 4.5139E-05 |
| gene4998 | .       | uncharacterized LOC726672                                    | 2.415772   | 0.00020969 |
| gene5003 | GB48078 | beta-1,4-glucuronyltransferase 1                             | -3.434570  | 2.8568E-05 |
| gene5006 | .       | uncharacterized LOC102656738                                 | -3.333378  | 2.096E-07  |
| gene5038 | GB54485 | UDP-glucuronosyltransferase 1-3-like                         | 25.221516  | 7.5989E-07 |
| gene5040 | GB54486 | myrosinase 1-like                                            | -11.439247 | 2.8381E-05 |
| gene5041 | .       | uncharacterized LOC107964635                                 | -18.978242 | 0.0007752  |
| gene5042 | GB54460 | uncharacterized LOC725017                                    | -27.563506 | 2.9099E-09 |
| gene5046 | GB54454 | uncharacterized LOC724783                                    | 2.084741   | 0.00272226 |
| gene5047 | .       | uncharacterized LOC107964657                                 | -2.170219  | 0.00029601 |
| gene5069 | GB43247 | alpha-glucosidase                                            | 5.173671   | 2.4769E-05 |
| gene5071 | GB43246 | uncharacterized protein KIAA0513                             | -2.113333  | 4.4307E-06 |



|          |         |                                                                                         |            |            |
|----------|---------|-----------------------------------------------------------------------------------------|------------|------------|
| gene5092 | GB52191 | coagulation factor X                                                                    | 2.709216   | 6.1636E-07 |
| gene5100 | GB52161 | cuticular protein 28                                                                    | -25.593781 | 1.9539E-09 |
| gene5101 | GB52199 | uncharacterized LOC100578593                                                            | 3.116975   | 0.00213543 |
| gene5102 | .       | uncharacterized LOC102655655                                                            | 2.931152   | 0.00017756 |
| gene5176 | GB46015 | probable cytochrome P450 301a1, mitochondrial                                           | -2.282413  | 0.00270119 |
| gene5177 | GB46062 | probable cytochrome P450 301a1, mitochondrial                                           | 2.585486   | 0.00094964 |
| gene5200 | GB46047 | cilia- and flagella-associated protein 70                                               | -2.163129  | 3.3869E-05 |
| gene5210 | GB46039 | tubulin alpha-1 chain-like                                                              | 3.985183   | 8.1926E-06 |
| gene5214 | GB46030 | cys-loop ligand-gated ion channel subunit 12344                                         | -2.433674  | 0.00015721 |
| gene5219 | .       | uncharacterized LOC100577517                                                            | -3.051288  | 6.3994E-07 |
| gene5221 | .       | uncharacterized LOC107964572                                                            | -4.805130  | 0.00017276 |
| gene5264 | .       | uncharacterized LOC102654275                                                            | 2.200757   | 0.00296546 |
| gene5267 | .       | uncharacterized LOC107964547                                                            | 2.603646   | 0.00168571 |
| gene5279 | GB48552 | mesencephalic astrocyte-derived neurotrophic factor homolog                             | -2.461108  | 0.00057829 |
| gene5280 | GB48576 | sushi, von Willebrand factor type A, EGF and pentraxin domain-containing protein 1-like | -2.379942  | 0.00024493 |
| gene5287 | GB48573 | probable multidrug resistance-associated protein lethal(2)03659                         | -2.038112  | 6.0261E-05 |
| gene5288 | .       | uncharacterized LOC107964602                                                            | -2.033948  | 0.00079471 |
| gene5292 | .       | uncharacterized LOC107964603                                                            | 3.161602   | 3.8136E-05 |
| gene5335 | .       | uncharacterized LOC100578409                                                            | 3.977084   | 2.6788E-06 |
| gene5340 | GB41427 | catalase                                                                                | 2.777956   | 2.6476E-06 |
| gene5362 | .       | uncharacterized LOC102654087                                                            | 2.127095   | 1.784E-05  |
| gene5370 | GB41495 | sarcalumenin                                                                            | -2.735264  | 0.00053204 |
| gene5406 | .       | uncharacterized LOC102655393                                                            | 2.941139   | 1.456E-05  |
| gene5415 | .       | protein mab-21                                                                          | 7.805535   | 3.9919E-06 |
| gene5455 | .       | uncharacterized LOC102656909                                                            | 2.258139   | 3.6195E-05 |
| gene5506 | GB43409 | oocyte zinc finger protein XICOF8.4-like                                                | 2.008260   | 0.01365486 |
| gene5530 | .       | uncharacterized LOC107964540                                                            | 2.853806   | 0.00017616 |
| gene5531 | GB53565 | endochitinase                                                                           | -4.251362  | 0.00054833 |
| gene5535 | GB53567 | branched-chain-amino-acid aminotransferase, cytosolic-like                              | -2.914179  | 2.6339E-06 |
| gene5569 | GB53579 | putative glucosylceramidase 4                                                           | -2.278800  | 1.2024E-05 |
| gene5641 | GB45376 | putative peptidyl-prolyl cis-trans isomerase dodo                                       | 2.262796   | 5.7378E-05 |
| gene5756 | .       | uncharacterized LOC102655018                                                            | 3.179953   | 2.3804E-06 |
| gene5760 | .       | uncharacterized LOC107964673                                                            | 2.529864   | 6.9666E-06 |
| gene5765 | GB45464 | putative leucine-rich repeat-                                                           | 2.650881   | 0.00064174 |

|          |         |                                                        |           |            |
|----------|---------|--------------------------------------------------------|-----------|------------|
|          |         | containing protein<br>DDB_G0290503                     |           |            |
| gene5858 | GB52877 | uncharacterized LOC726699                              | -2.016380 | 6.3971E-05 |
| gene5892 | GB49700 | facilitated trehalose transporter<br>Tret1-like        | 2.240923  | 0.00010105 |
| gene5909 | GB44265 | uncharacterized LOC100576687                           | 5.602897  | 1.5526E-05 |
| gene5952 | GB46276 | apolipoprotein D-like                                  | -2.218468 | 0.00427663 |
| gene5958 | GB42567 | venom dipeptidyl peptidase 4-like                      | -2.647022 | 0.00703827 |
| gene5979 | .       | protein takeout-like                                   | -3.757935 | 1.8553E-07 |
| gene5987 | GB42550 | mitochondrial amidoxime-<br>reducing component 1-like  | -6.479208 | 4.2929E-07 |
| gene5990 | .       | uncharacterized LOC107964756                           | 2.057614  | 0.00449195 |
| gene5992 | .       | uncharacterized LOC102654659                           | 2.103421  | 3.4498E-05 |
| gene6022 | .       | uncharacterized LOC100577571                           | 9.533861  | 0.00048738 |
| gene6023 | GB53798 | esterase E4-like                                       | 7.452972  | 4.6841E-05 |
| gene6024 | GB53775 | retinol dehydrogenase 14                               | 4.469145  | 0.00043984 |
| gene6037 | GB53805 | uncharacterized protein<br>DDB_G0272420-like           | 2.707648  | 9.9676E-05 |
| gene6051 | GB49240 | aldehyde dehydrogenase,<br>mitochondrial               | -2.511599 | 0.00059239 |
| gene6090 | GB43298 | loricrin-like                                          | -6.631094 | 1.7843E-05 |
| gene6106 | GB43309 | uncharacterized LOC100576528                           | -2.037006 | 0.00547432 |
| gene6135 | .       | uncharacterized LOC102655685                           | 2.141516  | 0.00011653 |
| gene6138 | GB47974 | carboxylesterase                                       | -2.454580 | 0.00423599 |
| gene6166 | GB40976 | heat shock protein 90                                  | 3.159889  | 1.6158E-05 |
| gene6171 | .       | facilitated trehalose transporter<br>Tret1-like        | -3.086859 | 0.0001201  |
| gene6173 | .       | ras-related and estrogen-regulated<br>growth inhibitor | -2.552357 | 0.00019261 |
| gene6175 | GB40967 | tyrosine hydroxylase                                   | -3.771429 | 1.7429E-05 |
| gene6210 | GB42487 | calpain-C                                              | 2.250530  | 1.6427E-05 |
| gene6217 | .       | organic cation transporter protein                     | -3.347542 | 0.00834589 |
| gene6230 | GB42469 | phospholipase B1, membrane-<br>associated-like         | -4.372407 | 6.8849E-06 |
| gene6231 | GB42468 | phospholipase B1, membrane-<br>associated-like         | -2.345035 | 6.8608E-05 |
| gene6232 | GB42467 | phospholipase B1, membrane-<br>associated-like         | -3.321052 | 3.332E-05  |
| gene6287 | GB44294 | uncharacterized LOC100579008                           | 2.615971  | 0.00023572 |
| gene6289 | GB44367 | phospholipase A2-like                                  | -9.382436 | 2.7094E-05 |
| gene6293 | .       | uncharacterized LOC102655868                           | 2.380593  | 3.8659E-05 |
| gene6324 | GB44311 | actin related protein 1                                | 3.542475  | 0.00019024 |
| gene6347 | .       | histone-lysine N-<br>methyltransferase SETMAR-like     | -4.071479 | 7.6928E-06 |
| gene6416 | GB48125 | myosin-10                                              | -3.430120 | 7.7932E-06 |

|          |         |                                                           |            |            |
|----------|---------|-----------------------------------------------------------|------------|------------|
| gene6430 | GB48147 | uncharacterized LOC100578269                              | 3.114942   | 0.00062683 |
| gene6436 | GB48134 | L-lactate dehydrogenase-like                              | 14.025383  | 4.9111E-07 |
| gene6458 | .       | uncharacterized LOC102654281                              | -2.193777  | 0.0001326  |
| gene6476 | .       | uncharacterized LOC102656347                              | 2.278664   | 0.00816875 |
| gene6525 | GB41163 | RWD domain-containing protein 2A                          | 2.021294   | 2.2064E-05 |
| gene6563 | GB41126 | synaptic vesicle glycoprotein 2C-like                     | -6.544206  | 0.00018636 |
| gene6577 | .       | pro-resilin-like                                          | -46.722745 | 0.00018686 |
| gene6578 | .       | cuticular protein 8                                       | -2.590800  | 0.00024665 |
| gene6583 | GB40451 | alanine aminotransferase 1                                | 3.249913   | 3.1523E-06 |
| gene6584 | GB40442 | cysteine sulfinic acid decarboxylase                      | 2.289774   | 7.0696E-05 |
| gene6589 | GB40438 | uncharacterized LOC724393                                 | 2.232474   | 0.00105127 |
| gene6604 | GB40425 | uncharacterized LOC727649                                 | -2.521193  | 0.00125275 |
| gene6621 | .       | uncharacterized LOC102653729                              | 2.202832   | 0.0004429  |
| gene6658 | .       | uncharacterized LOC102656154                              | 2.472142   | 9.3915E-05 |
| gene6723 | GB40548 | myosin heavy chain, non-muscle-like                       | 2.403737   | 0.00092702 |
| gene6745 | GB40343 | uncharacterized LOC413620                                 | -2.569486  | 0.00360616 |
| gene6759 | GB40337 | pyrokinin-like receptor 1                                 | -2.342075  | 0.00011245 |
| gene6761 | GB40336 | neutral ceramidase                                        | -2.373927  | 0.00052206 |
| gene6773 | GB54519 | uncharacterized LOC100577080                              | -2.251793  | 0.00024397 |
| gene6774 | GB54518 | uncharacterized LOC100577110                              | -2.150727  | 0.00166191 |
| gene6781 | GB54538 | uncharacterized LOC411248                                 | -8.030113  | 0.00043295 |
| gene6793 | GB54506 | uncharacterized LOC411253                                 | 2.334122   | 5.6186E-05 |
| gene6803 | .       | uncharacterized LOC102656871                              | 32.426704  | 1.0371E-09 |
| gene6847 | GB43909 | plasma membrane calcium-transporting ATPase 2             | 2.319811   | 2.7212E-05 |
| gene6856 | GB43823 | chemosensory protein 1                                    | 6.442684   | 0.00015308 |
| gene6890 | GB43892 | cytosolic 10-formyltetrahydrofolate dehydrogenase         | -3.947472  | 3.7944E-06 |
| gene6896 | GB43847 | doublesex- and mab-3-related transcription factor A2-like | -2.103741  | 0.00246578 |
| gene6919 | GB43877 | aquaporin-like                                            | -2.179909  | 0.00030363 |
| gene6939 | GB43862 | uncharacterized LOC100577444                              | 2.372326   | 0.00497101 |
| gene6940 | .       | uncharacterized LOC102654944                              | 3.025725   | 0.00169346 |
| gene6963 | GB41756 | GB15078 protein                                           | 2.192376   | 0.00981783 |
| gene6964 | GB41757 | immunoglobulin domain-containing protein oig-1-like       | 2.128232   | 0.00655322 |
| gene6972 | GB41760 | lipase 3-like                                             | -15.389973 | 0.00017827 |
| gene7011 | .       | probable uridine nucleosidase 2                           | -2.200220  | 0.00014567 |
| gene7027 | .       | uncharacterized LOC107964906                              | 4.023462   | 4.2494E-05 |

|          |         |                                                                     |           |            |
|----------|---------|---------------------------------------------------------------------|-----------|------------|
| gene7029 | GB41792 | uncharacterized protein<br>DDB_G0287625-like                        | 2.376118  | 2.7265E-05 |
| gene7051 | GB41806 | calcyphosin-like protein                                            | 2.356061  | 0.00011466 |
| gene7079 | GB41855 | patched domain-containing<br>protein 3                              | 2.125340  | 2.2891E-05 |
| gene7092 | GB41844 | ATP-binding cassette sub-family<br>G member 5                       | 2.757558  | 5.4545E-06 |
| gene7107 | GB41833 | uncharacterized LOC100576880                                        | -2.108939 | 0.0089754  |
| gene7108 | GB52819 | uncharacterized LOC551572                                           | -3.319770 | 1.1877E-06 |
| gene7110 | GB52854 | cuticular protein analogous to<br>peritrophins 3-E                  | -2.730426 | 3.2856E-05 |
| gene7112 | GB52824 | pro-resilin                                                         | -2.136907 | 0.00353176 |
| gene7119 | .       | uncharacterized LOC102655947                                        | -2.993078 | 0.00018441 |
| gene7184 | GB48851 | myosin heavy chain 95F                                              | -2.398580 | 4.07E-05   |
| gene7185 | GB48850 | fatty-acid amide hydrolase 2-B-<br>like                             | -6.436911 | 0.00061067 |
| gene7211 | GB41979 | UTP--glucose-1-phosphate<br>uridylyltransferase                     | 2.213768  | 8.4812E-05 |
| gene7238 | GB42000 | cAMP-specific 3',5'-cyclic<br>phosphodiesterase                     | 2.380219  | 3.2857E-05 |
| gene7241 | GB41965 | uncharacterized LOC100576936                                        | 2.304946  | 0.00034111 |
| gene7263 | GB51697 | hexamerin 70b                                                       | -2.075809 | 0.00682758 |
| gene7265 | GB51696 | hexamerin 70c                                                       | -2.311419 | 4.9993E-06 |
| gene7290 | GB51729 | 4-coumarate--CoA ligase 1-like                                      | -2.349443 | 0.00032978 |
| gene7293 | GB51732 | calcium and integrin-binding<br>protein 1-like                      | 3.525198  | 3.4721E-06 |
| gene7301 | GB51736 | tweedle motif cuticular protein 2                                   | 3.836771  | 0.00022627 |
| gene7317 | GB51741 | peptidoglycan recognition protein<br>S3                             | 2.020008  | 0.00079545 |
| gene7332 | GB51656 | zinc finger HIT domain-<br>containing protein 3                     | -2.683185 | 1.233E-05  |
| gene7341 | GB51653 | myosin heavy chain, muscle                                          | -2.220551 | 0.00012218 |
| gene7369 | GB45538 | fructose-1,6-bisphosphatase 1                                       | 2.441943  | 1.3296E-05 |
| gene7384 | GB47140 | uncharacterized LOC409465                                           | 4.802541  | 1.0161E-06 |
| gene7386 | GB47138 | calcium-activated potassium<br>channel slowpoke                     | -2.138337 | 4.439E-05  |
| gene7391 | GB47136 | uncharacterized LOC724177                                           | 2.240035  | 0.00010027 |
| gene7392 | .       | uncharacterized LOC102654076                                        | 2.264333  | 5.5202E-05 |
| gene7395 | GB41403 | lachesin-like                                                       | -3.097082 | 0.00018562 |
| gene7397 | GB41406 | uncharacterized LOC413274                                           | -2.466960 | 2.0398E-05 |
| gene7409 | .       | glycerol-3-phosphate<br>dehydrogenase [NAD(+)],<br>cytoplasmic-like | -7.832446 | 2.1015E-05 |
| gene7485 | .       | uncharacterized LOC102655174                                        | -2.196754 | 0.00305232 |
| gene7495 | .       | myb/SANT-like DNA-binding<br>domain-containing protein 3            | 2.125386  | 0.00224937 |

|          |         |                                                         |            |            |
|----------|---------|---------------------------------------------------------|------------|------------|
| gene7543 | GB42787 | dentin sialophosphoprotein-like                         | -2.151930  | 0.00099058 |
| gene7546 | GB42792 | uncharacterized LOC409805                               | -2.380099  | 0.00175021 |
| gene7554 | GB42704 | protein takeout-like                                    | -43.542537 | 3.7655E-07 |
| gene7558 | GB42797 | circadian clock-controlled protein                      | -4.178508  | 4.6525E-05 |
| gene7560 | GB42798 | protein takeout-like                                    | -6.141341  | 8.6092E-05 |
| gene7561 | GB42702 | circadian clock-controlled protein-like                 | -64.759207 | 5.9036E-05 |
| gene7562 | GB42701 | uncharacterized LOC100576902                            | -2.456413  | 0.00121434 |
| gene7563 | GB42799 | protein takeout-like                                    | -24.764958 | 3.4855E-06 |
| gene7564 | GB42800 | uncharacterized LOC727028                               | 11.492256  | 0.00023038 |
| gene7565 | .       | MFS-type transporter SLC18B1-like                       | 5.675346   | 2.4589E-06 |
| gene7566 | GB42802 | MFS-type transporter SLC18B1-like                       | 6.254687   | 1.0775E-05 |
| gene7577 | GB42693 | la protein homolog                                      | 2.922912   | 0.00030599 |
| gene7590 | .       | uncharacterized LOC724583                               | -10.363591 | 0.00013033 |
| gene7613 | GB42673 | retinol dehydrogenase 10-A-like                         | 3.734285   | 0.00291791 |
| gene7673 | GB42634 | mitochondrial folate transporter/carrier                | 2.043926   | 2.8875E-05 |
| gene7678 | .       | uncharacterized protein C11orf70 homolog                | 2.135214   | 0.03132662 |
| gene7715 | GB42612 | pupal cuticle protein 20                                | -7.928902  | 0.00010683 |
| gene7745 | GB42596 | CG1567-like                                             | -2.992161  | 0.00082685 |
| gene7748 | GB42594 | organic solute transporter alpha-like protein           | -2.464993  | 0.00048591 |
| gene7749 | .       | inner centromere protein A                              | -2.492674  | 2.0634E-06 |
| gene7770 | GB42581 | cuticular protein 11                                    | -2.494665  | 0.00203893 |
| gene7771 | GB42580 | D-beta-hydroxybutyrate dehydrogenase, mitochondrial     | -2.586635  | 0.00063591 |
| gene7773 | .       | uncharacterized LOC100576161                            | -42.515252 | 0.00040273 |
| gene7790 | .       | microRNA 9889                                           | 2.076709   | 0.01497337 |
| gene7820 | GB53371 | odorant binding protein 3                               | -2.227137  | 0.00727453 |
| gene7847 | .       | chymotrypsin-like protease CTRL-1                       | -5.109383  | 9.1683E-06 |
| gene7875 | GB53414 | serine/threonine-protein kinase ICK                     | -3.111528  | 1.8993E-05 |
| gene7914 | GB53428 | nicotinic acetylcholine receptor beta2 subunit          | -2.314940  | 0.00033027 |
| gene7926 | GB53434 | p21-activated protein kinase-interacting protein 1-like | 2.074931   | 0.00076006 |
| gene7927 | GB53300 | endothelin-converting enzyme 1-like                     | -2.584253  | 0.00081318 |
| gene7962 | GB56028 | uncharacterized LOC100576134                            | 2.403120   | 0.0005235  |
| gene7968 | GB47918 | netrin receptor UNC5C                                   | -3.319316  | 9.6408E-05 |
| gene7981 | .       | uncharacterized LOC102656324                            | 2.038131   | 3.4394E-05 |
| gene8021 | GB46369 | cytochrome c1, heme protein,                            | -2.238272  | 0.00929497 |

|          |         |                                                                                  |           |            |
|----------|---------|----------------------------------------------------------------------------------|-----------|------------|
|          |         | mitochondrial                                                                    |           |            |
| gene8059 | GB55889 | matrix metalloproteinase-14                                                      | 2.776308  | 0.00046926 |
| gene8062 | GB55888 | kinesin 3A                                                                       | -2.196434 | 8.3565E-05 |
| gene8166 | GB48382 | solute carrier family 22 member 21-like                                          | -2.984152 | 7.4247E-06 |
| gene8168 | GB48380 | major facilitator superfamily domain-containing protein 8                        | -2.143459 | 7.7175E-05 |
| gene8194 | GB48364 | inactive hydroxysteroid dehydrogenase-like protein 1                             | -2.427318 | 0.00022364 |
| gene8195 | GB48419 | carbohydrate sulfotransferase 11-like                                            | -2.486161 | 3.3711E-05 |
| gene8212 | .       | uncharacterized LOC100578455                                                     | 2.602926  | 0.00070076 |
| gene8216 | GB48350 | dehydrogenase/reductase (SDR family) member 4                                    | -2.000551 | 0.00554912 |
| gene8228 | GB48436 | .                                                                                | 10.091832 | 0.00221603 |
| gene8229 | GB48344 | G-protein coupled receptor moody                                                 | 13.178946 | 1.4708E-06 |
| gene8262 | GB48331 | GTP-binding protein RAD-like                                                     | -2.126168 | 0.00154127 |
| gene8267 | GB54260 | probable 2-oxoglutarate dehydrogenase E1 component DHKTD1 homolog, mitochondrial | -2.083953 | 0.0014897  |
| gene8305 | .       | uncharacterized LOC102655156                                                     | 15.341224 | 2.3913E-05 |
| gene8317 | GB54226 | unconventional myosin-IXb                                                        | 2.685588  | 0.0002244  |
| gene8325 | GB54298 | stromal cell-derived factor 2-like                                               | -2.268797 | 1.2282E-06 |
| gene8362 | .       | uncharacterized LOC102655726                                                     | -2.132831 | 0.0010987  |
| gene8364 | GB50876 | uncharacterized LOC100578744                                                     | -2.286682 | 0.00078392 |
| gene8377 | GB50885 | uncharacterized LOC409648                                                        | -3.087026 | 5.9114E-05 |
| gene8384 | .       | uncharacterized LOC102654762                                                     | 3.132497  | 0.00010526 |
| gene8387 | GB50891 | solute carrier organic anion transporter family member 2A1                       | -2.730443 | 2.3677E-06 |
| gene8406 | GB51159 | uncharacterized LOC413925                                                        | 2.005570  | 0.00111021 |
| gene8413 | .       | uncharacterized LOC107965032                                                     | 2.603770  | 0.00069118 |
| gene8414 | GB51155 | uncharacterized LOC726201                                                        | 2.753282  | 0.00011649 |
| gene8418 | .       | uncharacterized LOC102656499                                                     | 5.855757  | 2.1636E-07 |
| gene8484 | .       | zinc transporter 2-like                                                          | -2.213424 | 0.00073224 |
| gene8489 | GB50936 | odorant binding protein 10                                                       | -2.098094 | 0.0001361  |
| gene8506 | GB50944 | translocating chain-associated membrane protein 1-like 1                         | -2.419820 | 9.9623E-06 |
| gene8513 | GB50949 | uncharacterized LOC408282                                                        | -2.005135 | 0.00144436 |
| gene8524 | GB51095 | cryptochrome 2                                                                   | -2.012087 | 0.00103934 |
| gene8530 | .       | Z band alternatively spliced PDZ-motif protein 66                                | -2.069004 | 0.0008528  |
| gene8580 | .       | uncharacterized LOC102654307                                                     | 3.500907  | 1.6817E-05 |
| gene8583 | GB51063 | uncharacterized LOC552276                                                        | 2.034325  | 0.0005744  |

|          |         |                                                           |           |            |
|----------|---------|-----------------------------------------------------------|-----------|------------|
| gene8630 | GB51014 | EF-hand domain-containing protein D2 homolog              | 9.274310  | 1.513E-06  |
| gene8631 | .       | uncharacterized LOC107965113                              | 2.099730  | 5.2077E-05 |
| gene8642 | GB48813 | uncharacterized LOC408277                                 | 4.002738  | 0.03269999 |
| gene8655 | .       | uncharacterized LOC102653912                              | 2.189424  | 0.01413237 |
| gene8682 | .       | uncharacterized LOC100578719                              | 2.734002  | 5.9822E-06 |
| gene8686 | .       | uncharacterized LOC107965036                              | -4.163160 | 2.0377E-05 |
| gene8687 | GB48784 | mitochondrial cytochrome C                                | -2.915253 | 2.3651E-06 |
| gene8730 | .       | abaecin                                                   | -2.227488 | 0.00094563 |
| gene8763 | .       | uncharacterized LOC102654282                              | 2.106016  | 0.00010217 |
| gene8765 | .       | la-related protein 6                                      | 2.785790  | 0.01880276 |
| gene8770 | GB46652 | peptidylprolyl isomerase B (cyclophilin B)                | -2.237452 | 1.9066E-05 |
| gene8778 | GB46601 | uncharacterized LOC724768                                 | 2.145454  | 0.00646763 |
| gene8806 | .       | neuropeptide Y receptor-like                              | 2.033534  | 0.00684134 |
| gene8850 | .       | uncharacterized LOC107965170                              | 2.089818  | 0.000394   |
| gene8877 | .       | uncharacterized LOC102656589                              | 2.082325  | 0.00044411 |
| gene8878 | .       | uncharacterized LOC102656717                              | 2.974179  | 4.3347E-05 |
| gene8903 | GB55205 | major royal jelly protein 1                               | 2.775429  | 7.8109E-06 |
| gene8904 | GB55206 | major royal jelly protein 4                               | 3.000317  | 0.00492088 |
| gene8906 | GB55207 | major royal jelly protein 6                               | 4.418685  | 5.555E-06  |
| gene8907 | GB55208 | major royal jelly protein 5                               | 2.103290  | 0.00012465 |
| gene8921 | GB55220 | L-xylulose reductase                                      | 2.407545  | 0.00012398 |
| gene8923 | GB55164 | lethal(2) giant larvae protein homolog 1                  | -2.447357 | 0.00019548 |
| gene8924 | .       | uncharacterized LOC102655184                              | 2.571526  | 0.01137217 |
| gene8956 | GB55144 | dynein heavy chain 6, axonemal-like                       | 2.656964  | 0.0001001  |
| gene8963 | .       | uncharacterized LOC102654135                              | -4.345627 | 5.5769E-08 |
| gene8991 | .       | uncharacterized LOC102653864                              | -2.360588 | 0.00148276 |
| gene8994 | GB55059 | voltage-dependent T-type calcium channel subunit alpha-1G | -2.689348 | 0.0008041  |
| gene9017 | GB54056 | serine hydroxymethyltransferase                           | 2.081472  | 0.00073839 |
| gene9069 | GB53506 | protein FAM49B                                            | 2.285158  | 0.00351608 |
| gene9107 | GB47278 | sodium-independent sulfate anion transporter-like         | 3.103457  | 7.0569E-05 |
| gene9108 | GB47279 | cytochrome P450 6k1                                       | -3.657146 | 4.2821E-06 |
| gene9116 | .       | uncharacterized LOC107965218                              | 2.241863  | 0.00052815 |
| gene9117 | GB47285 | uncharacterized LOC408348                                 | 6.332625  | 0.00012868 |
| gene9118 | .       | uncharacterized LOC102656336                              | 6.919692  | 5.1147E-05 |
| gene9130 | GB47301 | UDP-glucuronosyltransferase 2C1-like                      | 3.132103  | 0.00029741 |
| gene9157 | .       | uncharacterized LOC102655369                              | 4.201503  | 8.7873E-05 |

|          |         |                                                                 |            |            |
|----------|---------|-----------------------------------------------------------------|------------|------------|
| gene9263 | GB45145 | MAGUK p55 subfamily member 6                                    | 2.089043   | 0.00032887 |
| gene9264 | .       | uncharacterized LOC102655046                                    | 4.925405   | 0.00438657 |
| gene9265 | .       | uncharacterized LOC107965149                                    | 2.176239   | 0.00095735 |
| gene9266 | .       | uncharacterized LOC107965150                                    | 2.240585   | 0.00080803 |
| gene9278 | GB45151 | uncharacterized LOC408365                                       | -3.321891  | 4.2984E-05 |
| gene9298 | GB45157 | protein big brother                                             | -3.615951  | 1.3018E-05 |
| gene9335 | GB44996 | hexamerin 110                                                   | -2.591591  | 0.00026794 |
| gene9340 | .       | uncharacterized LOC102656066                                    | -3.128242  | 0.00018339 |
| gene9374 | GB44976 | ataxin-2 homolog                                                | 2.570372   | 2.5077E-05 |
| gene9425 | .       | apoptogenic protein 1, mitochondrial                            | -2.831451  | 0.00015076 |
| gene9431 | GB45211 | troponin C type I                                               | -2.289090  | 1.8936E-06 |
| gene9434 | .       | myosuppressin                                                   | -3.382781  | 0.00301655 |
| gene9470 | .       | uncharacterized LOC107965204                                    | -4.400544  | 0.00010031 |
| gene9471 | .       | uncharacterized LOC107965205                                    | -2.509911  | 0.01843079 |
| gene9472 | .       | uncharacterized LOC102653678                                    | -3.189259  | 5.1203E-06 |
| gene9488 | .       | uncharacterized LOC102654947                                    | 3.013025   | 0.01704573 |
| gene9495 | .       | uncharacterized LOC102655371                                    | 2.656014   | 0.00013915 |
| gene9590 | GB44867 | uncharacterized LOC100576985                                    | 5.363961   | 6.1013E-05 |
| gene9616 | GB43230 | low-density lipoprotein receptor-related protein 2              | -5.049410  | 0.00016769 |
| gene9624 | GB43225 | putative inorganic phosphate cotransporter                      | 2.071992   | 0.00280812 |
| gene9625 | GB43094 | uncharacterized LOC726019                                       | 2.809513   | 0.00012237 |
| gene9645 | GB43214 | dynein heavy chain 12, axonemal                                 | 2.192365   | 2.4551E-05 |
| gene9649 | GB43211 | carbohydrate sulfotransferase 9-like                            | 2.254586   | 0.00031913 |
| gene9663 | GB43205 | uncharacterized LOC725391                                       | -2.842104  | 2.2931E-05 |
| gene9671 | GB43201 | allatostatin C                                                  | 2.206377   | 0.0016996  |
| gene9690 | GB43130 | single Ig IL-1-related receptor-like                            | 2.084849   | 0.0031733  |
| gene9692 | GB43189 | probable multidrug resistance-associated protein lethal(2)03659 | -2.567258  | 2.9203E-05 |
| gene9740 | GB43168 | inositol 1,4,5-triphosphate kinase                              | 3.754242   | 5.8791E-07 |
| gene9744 | GB55730 | CUGBP Elav-like family member 4                                 | 2.783952   | 5.961E-06  |
| gene9761 | GB40218 | urea transporter 2-like                                         | -11.067725 | 7.8114E-07 |
| gene9763 | GB40228 | uncharacterized LOC100576488                                    | -5.442279  | 0.00028703 |
| gene9766 | GB40231 | collagen alpha chain CG42342-like                               | -2.295358  | 0.00014868 |
| gene9791 | GB40240 | myosin regulatory light chain 2                                 | -5.332578  | 0.00016902 |
| gene9795 | GB40198 | odorant receptor 13a-like                                       | -13.595296 | 1.146E-06  |
| gene9796 | GB40197 | odorant receptor 13a-like                                       | -14.484719 | 0.00020831 |



|           |         |                                                                                          |            |            |
|-----------|---------|------------------------------------------------------------------------------------------|------------|------------|
| gene9813  | GB51775 | myosin heavy chain 95F                                                                   | -2.541619  | 5.475E-06  |
| gene9815  | GB51782 | carboxypeptidase Q-like                                                                  | 2.273434   | 0.00020207 |
| gene9816  | GB51783 | carboxypeptidase Q-like                                                                  | 2.367622   | 0.00026103 |
| gene9822  | GB51787 | myosin light chain alkali                                                                | -3.608456  | 8.3284E-05 |
| gene9828  | .       | uncharacterized LOC107965329                                                             | -11.127903 | 0.0018841  |
| gene9829  | .       | uncharacterized LOC102653740                                                             | -4.685359  | 0.00050804 |
| gene9866  | GB55063 | dnaJ homolog subfamily C member 9-like                                                   | -2.446164  | 9.6677E-07 |
| gene9887  | GB53625 | uncharacterized LOC411622                                                                | -18.563436 | 0.00012431 |
| gene9928  | GB40603 | platelet binding protein GspB                                                            | -2.025832  | 7.7171E-05 |
| gene9931  | .       | uncharacterized LOC107965382                                                             | -2.844218  | 0.00039407 |
| gene9932  | GB40606 | uncharacterized LOC100577381                                                             | -4.112197  | 9.1503E-06 |
| gene9935  | .       | proline-rich extensin-like protein EPR1                                                  | -3.175223  | 0.00014348 |
| gene9936  | GB40610 | uncharacterized LOC100578276                                                             | -3.873352  | 8.96E-06   |
| gene9937  | GB40703 | cadherin-23                                                                              | -3.807018  | 1.4339E-05 |
| gene9939  | GB40614 | vitamin K-dependent gamma-carboxylase                                                    | 3.153446   | 1.5226E-07 |
| gene9944  | GB40619 | troponin C type IIIa                                                                     | -3.291405  | 1.1016E-06 |
| gene9956  | GB40697 | apamin protein                                                                           | -2.371599  | 0.0032866  |
| gene9974  | GB40635 | venom acid phosphatase Acph-1-like                                                       | -4.557016  | 0.00023332 |
| gene9986  | .       | uncharacterized LOC102655326                                                             | 2.274719   | 3.2043E-06 |
| gene9987  | .       | uncharacterized LOC107965308                                                             | 2.336989   | 7.98E-05   |
| gene10042 | GB49306 | ATP synthase, H <sup>+</sup> transporting, mitochondrial F1 complex, gamma polypeptide 1 | -2.248411  | 7.3114E-05 |
| gene10051 | .       | uncharacterized LOC107965323                                                             | 3.174751   | 1.9466E-05 |
| gene10088 | GB49328 | uncharacterized LOC552110                                                                | -2.396586  | 3.9383E-05 |
| gene10118 | GB49347 | prostaglandin reductase 1-like                                                           | 2.662713   | 2.9548E-05 |
| gene10149 | GB52023 | cytochrome P450 6AQ1                                                                     | -2.091298  | 0.0001805  |
| gene10154 | GB52052 | venom carboxylesterase-6                                                                 | -3.060460  | 5.1475E-05 |
| gene10160 | GB52014 | collagen alpha-1(I) chain-like                                                           | -2.457545  | 9.0758E-05 |
| gene10214 | GB52097 | scavenger receptor class B member 1                                                      | -8.724390  | 0.00107003 |
| gene10245 | GB51967 | ankyrin repeat domain-containing protein 6                                               | -2.025168  | 0.00018457 |
| gene10284 | GB54767 | zinc metalloproteinase nas-13                                                            | -2.403315  | 0.02005901 |
| gene10336 | .       | uncharacterized LOC107965426                                                             | -2.944667  | 0.00072656 |
| gene10340 | GB48243 | cyclin-dependent kinase 4                                                                | 19.189850  | 2.3973E-06 |
| gene10386 | GB48216 | troponin C type IIb                                                                      | -6.408872  | 7.6123E-05 |
| gene10391 | GB50677 | lipoma HMGIC fusion partner-like 2 protein                                               | -2.753003  | 0.00043244 |
| gene10439 | GB47995 | BMP and activin membrane-                                                                | -2.205850  | 0.0006159  |

|           |         |                                                          |           |            |
|-----------|---------|----------------------------------------------------------|-----------|------------|
|           |         | bound inhibitor homolog                                  |           |            |
| gene10446 | GB47990 | tropomyosin-1                                            | -2.498255 | 0.00066391 |
| gene10555 | GB40168 | 6-phosphofructo-2-kinase/fructose-2,6-bisphosphatase     | 2.535182  | 0.000215   |
| gene10576 | GB53865 | receptor-type guanylate cyclase gcy-4                    | 3.506546  | 4.1378E-05 |
| gene10616 | GB49852 | putative polypeptide N-acetylgalactosaminyltransferase 9 | -2.638395 | 7.5651E-05 |
| gene10647 | .       | uncharacterized LOC102655843                             | 2.058902  | 0.0001504  |
| gene10674 | GB49890 | cytochrome P450 6AS5                                     | 2.768433  | 5.9353E-06 |
| gene10675 | GB49885 | probable cytochrome P450 6a17                            | 2.364460  | 7.4183E-05 |
| gene10758 | GB48474 | probable chitinase 3                                     | -4.933703 | 6.452E-05  |
| gene10805 | GB42262 | uncharacterized LOC100576738                             | -4.816805 | 6.2419E-06 |
| gene10808 | GB42277 | ATP-dependent RNA helicase dbp2-like                     | -2.340875 | 0.00257508 |
| gene10864 | GB43575 | trehalase-like                                           | 2.351334  | 2.1029E-06 |
| gene10865 | .       | uncharacterized LOC102653891                             | -3.351023 | 1.1061E-05 |
| gene10866 | .       | uncharacterized LOC100577863                             | -4.419062 | 0.00050688 |
| gene10891 | GB43560 | insulin-like peptide 2                                   | -2.306428 | 0.00158365 |
| gene10945 | GB43738 | phenoloxidase subunit A3                                 | 2.021793  | 0.00024337 |
| gene10946 | GB43737 | facilitated trehalose transporter Tret1-2 homolog        | -2.736216 | 0.00361452 |
| gene10963 | .       | cytochrome P450 9e2                                      | -2.331485 | 0.00039113 |
| gene10969 | .       | uncharacterized LOC107965484                             | 2.035521  | 0.00018372 |
| gene10985 | GB54213 | probable cation-transporting ATPase 13A3                 | -3.433994 | 0.00042042 |
| gene11060 | GB54172 | sodium-independent sulfate anion transporter-like        | -2.810920 | 7.4659E-05 |
| gene11123 | GB52756 | apyrase                                                  | -2.228768 | 0.00023247 |
| gene11130 | GB52721 | protein lozenge-like                                     | 3.841676  | 2.9965E-05 |
| gene11132 | GB52761 | protein lozenge-like                                     | 2.168913  | 0.00010374 |
| gene11138 | GB52763 | uncharacterized LOC100578776                             | 3.037758  | 0.00156506 |
| gene11139 | .       | uncharacterized LOC107965540                             | 2.181985  | 6.2475E-05 |
| gene11144 | GB52767 | chromatin assembly factor 1 subunit A-B                  | 2.003848  | 0.00015386 |
| gene11146 | .       | translation initiation factor IF-2-like                  | 2.131686  | 0.00208274 |
| gene11148 | .       | uncharacterized LOC725784                                | 2.399502  | 7.1812E-06 |
| gene11149 | .       | uncharacterized LOC100576925                             | 4.105549  | 0.0002386  |
| gene11169 | GB52786 | vesicle-associated membrane protein 2                    | -2.280052 | 0.00388572 |
| gene11245 | GB41651 | glutamate dehydrogenase, mitochondrial                   | -2.364316 | 8.2437E-05 |
| gene11287 | GB41629 | Eph receptor tyrosine kinase                             | -2.273353 | 0.00108173 |

|           |         |                                                                  |            |            |
|-----------|---------|------------------------------------------------------------------|------------|------------|
| gene11362 | GB47075 | uncharacterized LOC409185                                        | -4.194239  | 3.029E-06  |
| gene11366 | .       | ras-related and estrogen-regulated growth inhibitor-like protein | -2.033326  | 0.01322606 |
| gene11375 | GB41188 | ABC transporter G family member 20-like                          | -3.058140  | 4.916E-05  |
| gene11404 | GB46217 | cytoplasmic aconitate hydratase-like                             | 2.215341   | 1.7428E-05 |
| gene11426 | GB46223 | odorant binding protein 14                                       | 10.245410  | 0.00012565 |
| gene11474 | GB54417 | farnesol dehydrogenase-like                                      | -12.173741 | 4.7818E-06 |
| gene11481 | GB54664 | multiple epidermal growth factor-like domains protein 10         | 3.107895   | 0.00016854 |
| gene11503 | GB54687 | phosphate carrier protein, mitochondrial                         | -2.092876  | 0.00014476 |
| gene11526 | GB52910 | octopamine receptor                                              | -2.612552  | 0.00045109 |
| gene11539 | GB49476 | lysyl oxidase homolog 4                                          | -2.885570  | 1.8798E-05 |
| gene11604 | GB50550 | uncharacterized LOC100576592                                     | 3.293930   | 3.9067E-05 |
| gene11631 | GB50573 | uncharacterized LOC726094                                        | 2.848353   | 0.000263   |
| gene11663 | .       | uncharacterized LOC102654477                                     | 2.896772   | 0.00026317 |
| gene11685 | GB50609 | heat shock protein Hsp70Ab-like                                  | 2.695532   | 0.00038865 |
| gene11686 | .       | .                                                                | 2.452478   | 9.0976E-05 |
| gene11691 | GB50505 | angiotensin-converting enzyme                                    | 2.910050   | 4.268E-05  |
| gene11702 | GB47932 | headcase protein                                                 | 2.234550   | 3.5186E-05 |
| gene11705 | GB47931 | facilitated trehalose transporter Tret1-like                     | 5.754616   | 0.00044589 |
| gene11719 | .       | chymotrypsin inhibitor                                           | 3.643412   | 0.00251121 |
| gene11720 | .       | cysteine-rich venom protein 1                                    | 3.755802   | 0.00137805 |
| gene11725 | GB50116 | chymotrypsin inhibitor-like                                      | -2.797833  | 0.01247092 |
| gene11732 | GB50123 | myophilin                                                        | -3.410728  | 0.00035653 |
| gene11757 | GB50136 | BCL2/adenovirus E1B 19 kDa protein-interacting protein 3         | 2.195257   | 9.0469E-05 |
| gene11767 | .       | arrestin homolog                                                 | 3.466319   | 7.0935E-05 |
| gene11795 | .       | uncharacterized LOC102653894                                     | 2.015203   | 6.2322E-06 |
| gene11826 | GB50064 | complexin                                                        | -2.077092  | 0.01606743 |
| gene11836 | GB50060 | sulfotransferase family cytosolic 1B member 1-like               | -2.864448  | 0.00016969 |
| gene11851 | GB50180 | uncharacterized LOC552836                                        | 2.082354   | 0.00074246 |
| gene11859 | GB50184 | uncharacterized LOC410600                                        | 2.018267   | 0.00125777 |
| gene11863 | GB50189 | alpha-sarcoglycan                                                | 2.061741   | 0.00026522 |
| gene11927 | GB50012 | uncharacterized LOC726323                                        | 4.957633   | 2.2382E-05 |
| gene11937 | GB50226 | transferrin 1                                                    | 2.512968   | 0.00010888 |
| gene12016 | .       | uncharacterized LOC726965                                        | 2.160510   | 0.00308429 |
| gene12019 | .       | uncharacterized LOC410581                                        | -2.133795  | 4.0414E-05 |
| gene12070 | GB49937 | PTS-dependent dihydroxyacetone kinase, dihydroxyacetone-binding  | -2.017421  | 5.7042E-05 |

|           |         |                                                                        |            |            |
|-----------|---------|------------------------------------------------------------------------|------------|------------|
|           |         | subunit DhaK-like                                                      |            |            |
| gene12093 | .       | uncharacterized LOC102655415                                           | 2.910090   | 2.9301E-05 |
| gene12111 | GB54396 | elongation of very long chain fatty acids protein AAEL008004-like      | -8.320193  | 1.582E-05  |
| gene12124 | GB54395 | uncharacterized LOC413385                                              | 2.026865   | 0.00101534 |
| gene12186 | GB54350 | spermatogenesis-associated protein 6                                   | -2.147675  | 0.00025275 |
| gene12192 | GB54363 | ATPase family AAA domain-containing protein 3                          | 2.292249   | 0.0032788  |
| gene12196 | GB54356 | growth factor receptor-bound protein 14-like                           | 2.741723   | 0.00048745 |
| gene12199 | GB54361 | metabotropic glutamate receptor                                        | -5.000921  | 0.01487358 |
| gene12245 | .       | uncharacterized LOC107965723                                           | 2.115259   | 0.00026205 |
| gene12254 | .       | uncharacterized LOC102656308                                           | 2.106824   | 0.00062983 |
| gene12260 | .       | uncharacterized LOC100577695                                           | 2.671390   | 4.369E-05  |
| gene12264 | .       | uncharacterized LOC102656603                                           | 2.130556   | 7.6084E-05 |
| gene12267 | GB51283 | retinal dehydrogenase 1                                                | 2.850396   | 0.00077957 |
| gene12275 | .       | uncharacterized LOC102653684                                           | 3.304417   | 4.6625E-05 |
| gene12276 | GB51335 | dihydrolipoyl dehydrogenase, mitochondrial                             | -2.047804  | 0.00023173 |
| gene12305 | .       | uncharacterized LOC107965691                                           | 2.044803   | 0.01882709 |
| gene12309 | GB51356 | cytochrome P450 4G11                                                   | 2.501500   | 3.6074E-05 |
| gene12312 | GB51261 | TWiK family of potassium channels protein 7-like                       | -2.054059  | 6.0463E-06 |
| gene12398 | .       | insulin-like growth factor-binding protein complex acid labile subunit | -2.506791  | 0.00102021 |
| gene12412 | .       | uncharacterized LOC100577317                                           | -2.206467  | 0.00272629 |
| gene12445 | GB45609 | flavin-containing monooxygenase FMO GS-OX-like 4                       | -2.059361  | 0.00170954 |
| gene12453 | GB45614 | chymotrypsin inhibitor                                                 | -3.522875  | 0.00074934 |
| gene12455 | GB45951 | yellow-f                                                               | -4.495286  | 4.1516E-06 |
| gene12459 | GB45955 | beta-galactosidase-like                                                | -2.038168  | 9.6239E-06 |
| gene12472 | GB45943 | collagen alpha-5(IV) chain                                             | -2.352315  | 4.3931E-05 |
| gene12474 | GB45968 | collagen alpha-1(IV) chain                                             | -3.112472  | 3.6354E-05 |
| gene12481 | GB45973 | aromatic-L-amino-acid decarboxylase                                    | 3.792680   | 0.00011254 |
| gene12534 | .       | .                                                                      | -3.167605  | 9.864E-05  |
| gene12536 | GB48205 | uncharacterized LOC727444                                              | -4.427176  | 2.884E-05  |
| gene12580 | GB47902 | endocuticle structural glycoprotein SgAbd-1                            | -3.558980  | 3.6504E-05 |
| gene12585 | GB47906 | endocuticle structural glycoprotein ABD-4                              | -11.980619 | 0.00061604 |
| gene12591 | .       | uncharacterized LOC100577556                                           | -3.752655  | 2.7991E-05 |
| gene12653 | GB45746 | probable cytochrome P450 6a13                                          | -2.227748  | 3.6135E-05 |

|           |         |                                                          |           |            |
|-----------|---------|----------------------------------------------------------|-----------|------------|
| gene12679 | GB40877 | translocon-associated protein subunit delta              | -2.909555 | 3.3739E-05 |
| gene12729 | GB48510 | serine protease 34                                       | -2.880064 | 7.6711E-05 |
| gene12735 | .       | uncharacterized LOC107965774                             | -2.265675 | 0.01006336 |
| gene12764 | GB54299 | limbic system-associated membrane protein                | -2.096400 | 0.01728401 |
| gene12792 | GB46973 | uncharacterized LOC412222                                | -2.106465 | 8.4803E-06 |
| gene12810 | .       | uncharacterized LOC102656256                             | -2.454098 | 0.00563809 |
| gene12823 | .       | microRNA 3759                                            | -5.089569 | 0.0014839  |
| gene12835 | GB46813 | unconventional myosin-Ie-like                            | 3.240991  | 9.1726E-05 |
| gene12849 | GB52658 | general transcription factor 3C polypeptide 5            | -2.468238 | 0.00042859 |
| gene12850 | GB52656 | uncharacterized LOC552154                                | -4.295310 | 8.0112E-06 |
| gene12858 | GB17746 | putative lipoyltransferase 2, mitochondrial              | -2.769362 | 0.02326787 |
| gene12897 | GB55965 | dehydrogenase/reductase SDR family member 4-like         | -2.442749 | 2.6365E-05 |
| gene12968 | GB53270 | UPF0428 protein CXorf56 homolog                          | -2.032052 | 0.00027673 |
| gene12979 | GB53286 | uncharacterized LOC409402                                | 2.531915  | 6.4137E-05 |
| gene12984 | GB55986 | pancreatic triacylglycerol lipase                        | -3.833260 | 6.969E-06  |
| gene13008 | GB45919 | organic cation transporter protein                       | -3.391306 | 0.00080441 |
| gene13013 | GB41015 | glycine-rich cuticle protein                             | -4.309566 | 0.00108337 |
| gene13078 | GB50626 | phospholipase D3-like                                    | -3.343609 | 5.516E-05  |
| gene13079 | GB50627 | putative fatty acyl-CoA reductase                        | 3.037537  | 8.315E-07  |
| gene13084 | GB50622 | voltage-gated potassium channel subunit beta-2           | 2.054123  | 0.00176702 |
| gene13115 | .       | uncharacterized LOC102656271                             | -2.343414 | 0.01449895 |
| gene13116 | GB43353 | uncharacterized LOC727578                                | 2.720083  | 1.1229E-06 |
| gene13139 | GB49929 | laminin subunit alpha                                    | -2.070491 | 9.7391E-06 |
| gene13141 | GB49930 | peptide transporter family 1                             | -5.172679 | 2.5107E-05 |
| gene13150 | .       | uncharacterized LOC102654702                             | -2.383304 | 7.1234E-06 |
| gene13188 | .       | selenium-binding protein 1-like                          | -2.198227 | 0.00181018 |
| gene13194 | .       | uncharacterized LOC102656577                             | -2.058512 | 0.00617917 |
| gene13230 | GB42515 | FAD-dependent oxidoreductase domain-containing protein 1 | -2.090099 | 0.00102293 |
| gene13245 | GB50871 | serine/threonine-protein kinase SIK2                     | -5.999554 | 7.7734E-07 |
| gene13297 | GB48193 | acyl-CoA Delta(11) desaturase                            | -2.589854 | 0.0052068  |
| gene13300 | .       | uncharacterized LOC100578075                             | 2.496864  | 3.8798E-06 |
| gene13304 | GB42346 | uncharacterized LOC100578206                             | -2.121159 | 0.010659   |
| gene13320 | GB52278 | filamin-A-like                                           | 3.760396  | 0.00011548 |
| gene13331 | GB47132 | voltage-gated potassium channel subunit beta-2-like      | 2.200931  | 1.9914E-05 |
| gene13352 | .       | uncharacterized LOC102656820                             | 3.164486  | 0.00999336 |

|           |         |                                                                                           |            |            |
|-----------|---------|-------------------------------------------------------------------------------------------|------------|------------|
| gene13358 | .       | uncharacterized LOC725449                                                                 | 12.447528  | 0.00015513 |
| gene13369 | GB45748 | probable cytochrome P450 6a17                                                             | 2.467323   | 0.00347688 |
| gene13429 | GB41110 | uncharacterized LOC727546                                                                 | -12.898643 | 6.8718E-05 |
| gene13459 | .       | putative SLC9B1-like protein<br>SLC9B1P1                                                  | -2.802851  | 0.00292934 |
| gene13471 | GB43056 | catalase-like                                                                             | 2.411614   | 0.00013599 |
| gene13473 | GB43670 | endocuticle structural<br>glycoprotein SgAbd-8                                            | -2.558103  | 0.00594383 |
| gene13594 | GB49819 | branched-chain-amino-acid<br>aminotransferase, cytosolic-like                             | -3.751388  | 2.7882E-05 |
| gene13610 | GB41007 | dynein heavy chain 6, axonemal-<br>like                                                   | 2.452601   | 0.00182355 |
| gene13630 | .       | 3-hydroxy-3-methylglutaryl-<br>coenzyme A reductase-like                                  | -2.926283  | 6.9013E-05 |
| gene13653 | GB49662 | uncharacterized LOC100578648                                                              | 4.059510   | 0.00016984 |
| gene13661 | .       | uncharacterized LOC102654849                                                              | -3.202050  | 0.00067189 |
| gene13694 | .       | uncharacterized LOC102656237                                                              | -2.000002  | 0.00152702 |
| gene13700 | GB43350 | catalase-like                                                                             | 2.528500   | 0.00018919 |
| gene13755 | .       | uncharacterized LOC102655276                                                              | -2.233201  | 0.00342864 |
| gene13763 | GB47165 | carboxypeptidase Q-like                                                                   | 2.195575   | 0.00101191 |
| gene13803 | GB49509 | chymotrypsin inhibitor-like                                                               | -6.471307  | 0.0009525  |
| gene13811 | .       | uncharacterized LOC102653942                                                              | -2.603805  | 0.00213423 |
| gene13813 | GB47520 | uncharacterized LOC725305                                                                 | -2.141844  | 0.00566504 |
| gene13861 | .       | uncharacterized LOC102656002                                                              | -2.689892  | 0.00062286 |
| gene13899 | GB47536 | sarcalumenin-like                                                                         | -3.344862  | 0.00120188 |
| gene13910 | .       | probable 2-oxoglutarate<br>dehydrogenase E1 component<br>DHKTD1 homolog,<br>mitochondrial | -2.251044  | 0.00057705 |
| gene13919 | GB54490 | .                                                                                         | -2.438109  | 9.6833E-05 |
| gene13932 | GB48492 | take-out-like carrier protein                                                             | -3.628997  | 1.0388E-05 |
| gene13935 | .       | uncharacterized LOC102655346                                                              | -2.083626  | 0.00083659 |
| gene13939 | GB40897 | uncharacterized LOC100578351                                                              | 3.272960   | 6.4452E-05 |
| gene13963 | GB53986 | farnesol dehydrogenase-like                                                               | -14.170061 | 2.2214E-05 |
| gene14038 | GB43029 | actin, indirect flight muscle-like                                                        | -2.811388  | 0.0035955  |
| gene14052 | GB42343 | alanine--glyoxylate<br>aminotransferase 2-like                                            | 4.301236   | 7.7942E-05 |
| gene14065 | .       | ATP synthase F0 subunit 6                                                                 | -2.568427  | 0.01367801 |
| gene14066 | .       | cytochrome c oxidase subunit III                                                          | -2.056355  | 0.01679774 |
| rna29219  | .       | .                                                                                         | -2.261926  | 0.02833222 |
| rna29222  | .       | .                                                                                         | 3.856199   | 0.00124267 |
| rna29223  | .       | .                                                                                         | 2.126902   | 1.3829E-05 |
| rna29224  | .       | .                                                                                         | 2.494478   | 0.00668994 |
| rna29234  | .       | .                                                                                         | 4.992673   | 0.00013884 |

|          |   |   |          |            |
|----------|---|---|----------|------------|
| rna29236 | . | . | 3.020381 | 0.00236858 |
|----------|---|---|----------|------------|
