# Supplementary material for: Upregulation of Transferrin and Major Royal Jelly Proteins in the Spermathecal Fluid of Mated Honeybee (Apis mellifera) Queens
Source: MDPI journal article supplement (doi:10.3390/insects12080690), 2021-07-31
Supplement: s1 [file s1]

Table S2. The lists of genes related to ontology and pathway in the spermathecae using the online tool DAVID.

| Annotation                                                                                           | FDR         | Gene list                                                                                                                                               |
|------------------------------------------------------------------------------------------------------|-------------|---------------------------------------------------------------------------------------------------------------------------------------------------------|
| Gene Ontology (Top 10 terms of DAVID functional annotation)                                          |             |                                                                                                                                                         |
| Heme binding                                                                                         | 0.000759418 | GB46062, GB44808, GB45746, GB44513, GB45748, GB43056, GB49890, GB41427, GB55638, GB41406, GB52023, GB51356, GB48784, GB49885, GB46369                   |
| Structural constituent of cuticle                                                                    | 0.001871751 | GB42581, GB43670, GB47906, GB47902, GB52161, GB52824, GB43353, GB46312, GB42612, GB46297, GB46311, GB50438                                              |
| Monooxygenase activity                                                                               | 0.18318526  | GB46062, GB45746, GB52023, GB51356, GB44513, GB49885, GB45748, GB49890                                                                                  |
| Iron ion binding                                                                                     | 0.557327078 | GB46062, GB45746, GB52023, GB51356, GB44513, GB49885, GB40967, GB55515, GB45748, GB49890                                                                |
| Oxidoreductase activity, acting on paired donors with incorporation or reduction of molecular oxygen | 0.660356133 | GB46062, GB45746, GB52023, GB51356, GB44513, GB49885, GB45748, GB49890                                                                                  |
| Calcium ion binding                                                                                  | 2.001108598 | GB55889, GB41301, GB49809, GB41806, GB48216, GB50700, GB51014, GB40240, GB52279, GB48552, GB51732, GB48576, GB53139, GB45211, GB40703, GB51787, GB40619 |
| Pyridoxal phosphate binding                                                                          | 2.204567637 | GB51583, GB47379, GB40442, GB42550, GB40451, GB49543, GB42343, GB45973, GB54056                                                                         |
| Extracellular matrix structural constituent                                                          | 4.781500738 | GB52014, GB45943, GB45968, GB50700                                                                                                                      |
| Hydrolase activity, acting on ester bonds                                                            | 23.44193618 | GB41760, GB52756, GB42469, GB47668, GB42467                                                                                                             |

|                                                        |             |                                                                                                                                                                                                                                                                                                                                                                                                                                                         |
|--------------------------------------------------------|-------------|---------------------------------------------------------------------------------------------------------------------------------------------------------------------------------------------------------------------------------------------------------------------------------------------------------------------------------------------------------------------------------------------------------------------------------------------------------|
| Transmembrane transporter activity                     | 36.58030889 | GB41034, GB45919, GB41126, GB48978, GB48382                                                                                                                                                                                                                                                                                                                                                                                                             |
| Pathways (Top 10 terms of DAVID functional annotation) |             |                                                                                                                                                                                                                                                                                                                                                                                                                                                         |
| Tryptophan metabolism                                  | 0.042366006 | GB51583, GB55638, GB41427, GB43350, GB49240, GB45973, GB43056, GB51283                                                                                                                                                                                                                                                                                                                                                                                  |
| Metabolic pathways                                     | 0.113795868 | GB55499, GB41979, GB49937, GB48134, GB47379, GB49543, GB49240, GB51335, GB53579, GB45973, GB54056, GB55986, GB44430, GB48784, GB48078, GB17746, GB40451, GB46369, GB50626, GB49306, GB45834, GB49852, GB46217, GB45654, GB45538, GB53567, GB51583, GB45955, GB43168, GB48871, GB47503, GB40967, GB41651, GB55220, GB44491, GB51188, GB40336, GB55638, GB40734, GB47849, GB43247, GB49819, GB51591, GB43575, GB47301, GB51841, GB44367, GB48350, GB51283 |
| Biosynthesis of antibiotics                            | 0.221040796 | GB53567, GB41979, GB51583, GB48134, GB43350, GB51335, GB49240, GB43056, GB54056, GB41427, GB44430, GB47849, GB40734, GB49819, GB51591, GB45834, GB46217, GB45538, GB51283                                                                                                                                                                                                                                                                               |
| Carbon metabolism                                      | 0.577498775 | GB49937, GB41427, GB43350, GB44430, GB40734, GB41651, GB40451, GB45834, GB51335, GB46217, GB45538, GB43056, GB54056                                                                                                                                                                                                                                                                                                                                     |
| Gluconeogenesis                                        | 1.98469264  | GB48134, GB40734, GB49240, GB45834, GB51841, GB51335,                                                                                                                                                                                                                                                                                                                                                                                                   |

|                                          |             |                                                                                 |
|------------------------------------------|-------------|---------------------------------------------------------------------------------|
|                                          |             | GB45538, GB51283                                                                |
| Biosynthesis of amino acids              | 2.420712369 | GB53567, GB51583, GB40734, GB47849, GB49819, GB47503, GB40451, GB46217, GB54056 |
| Glyoxylate and dicarboxylate metabolism  | 4.45311345  | GB41427, GB43350, GB51335, GB46217, GB43056, GB54056                            |
| Oxocarboxylic acid metabolism            | 4.785491801 | GB53567, GB51583, GB49819, GB40451, GB46217                                     |
| ECM-receptor interaction                 | 4.785491801 | GB52014, GB45943, GB45968, GB49929, GB41126                                     |
| Pentose and glucuronate interconversions | 4.785491801 | GB41979, GB47301, GB55220, GB49240, GB51283                                     |
