# Supplementary figures and images for: Upregulation of Transferrin and Major Royal Jelly Proteins in the Spermathecal Fluid of Mated Honeybee (Apis mellifera) Queens
Source: MDPI journal article supplement (doi:10.3390/insects12080690), 2021-07-31

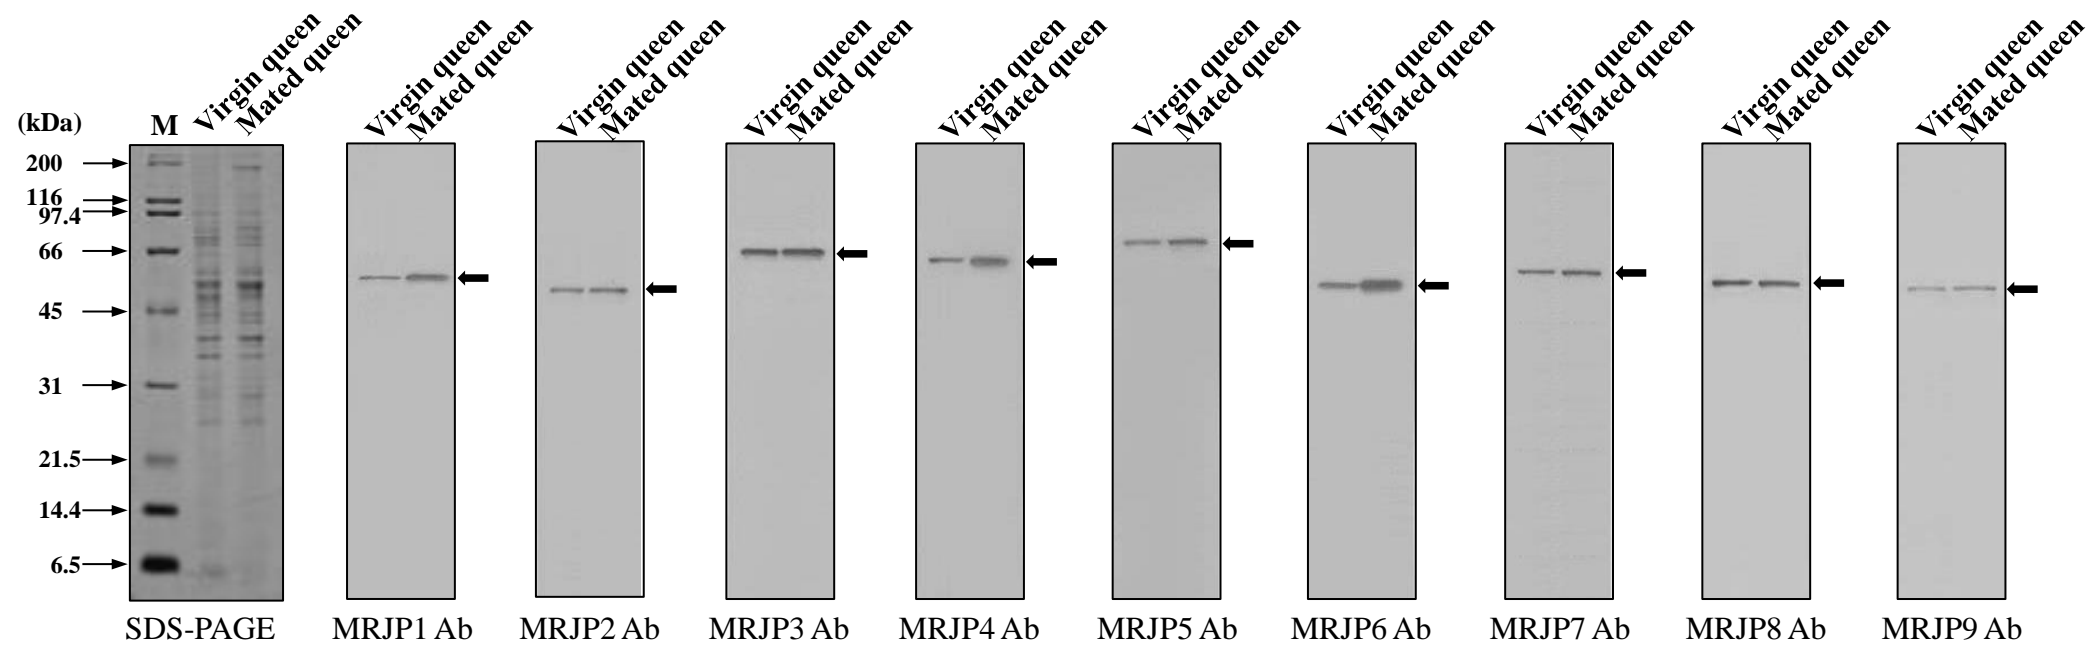

Supplement: s1 [file s1]
